# Supplementary material for: Response of soil nutrients and erodibility to slope aspect in the northern agro-pastoral ecotone, China
Source: Copernicus journal article supplement (doi:10.5194/soil-10-61-2024), 2024-01-17
Supplement: Supplementary file 1 [file soil-10-61-2024-supplement.pdf]

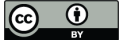

*Supplement of*

## **Response of soil nutrients and erodibility to slope aspect in the northern agro-pastoral ecotone, China**

**Yuxin Wu et al.**

*Correspondence to:* Guodong Jia ([jiaguodong@bjfu.edu.cn](mailto:jiaguodong@bjfu.edu.cn)) and Xinxiao Yu ([yuxinxiao11111@163.com](mailto:yuxinxiao11111@163.com))

The copyright of individual parts of the supplement might differ from the article licence.

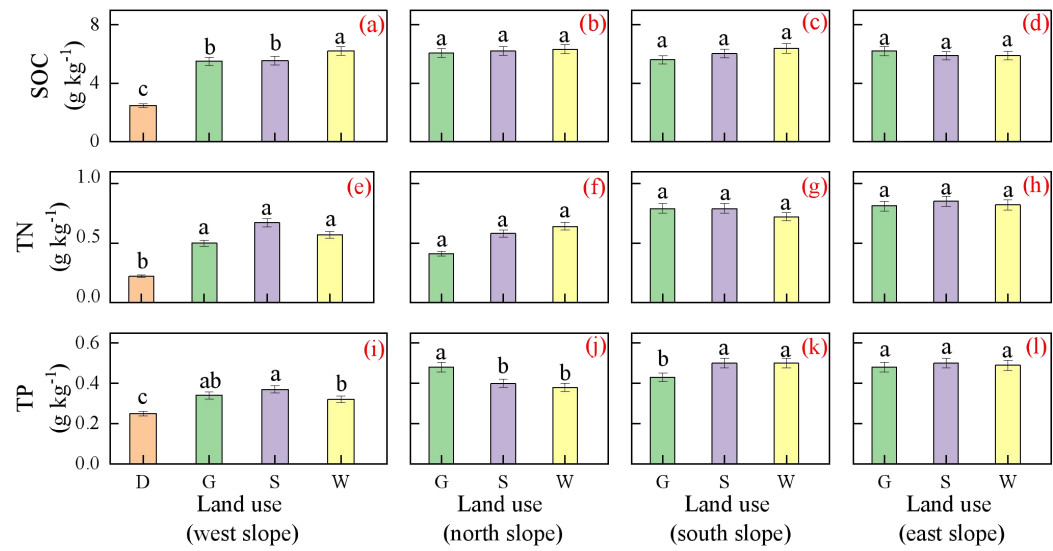

**Fig. S1.** Variation of soil nutrients indicators with land use along slope aspects. D, degraded land; G, grassland; S, shrubland; W, woodland. Different letters indicate significant differences among different seasons at  $P < 0.05$  level.

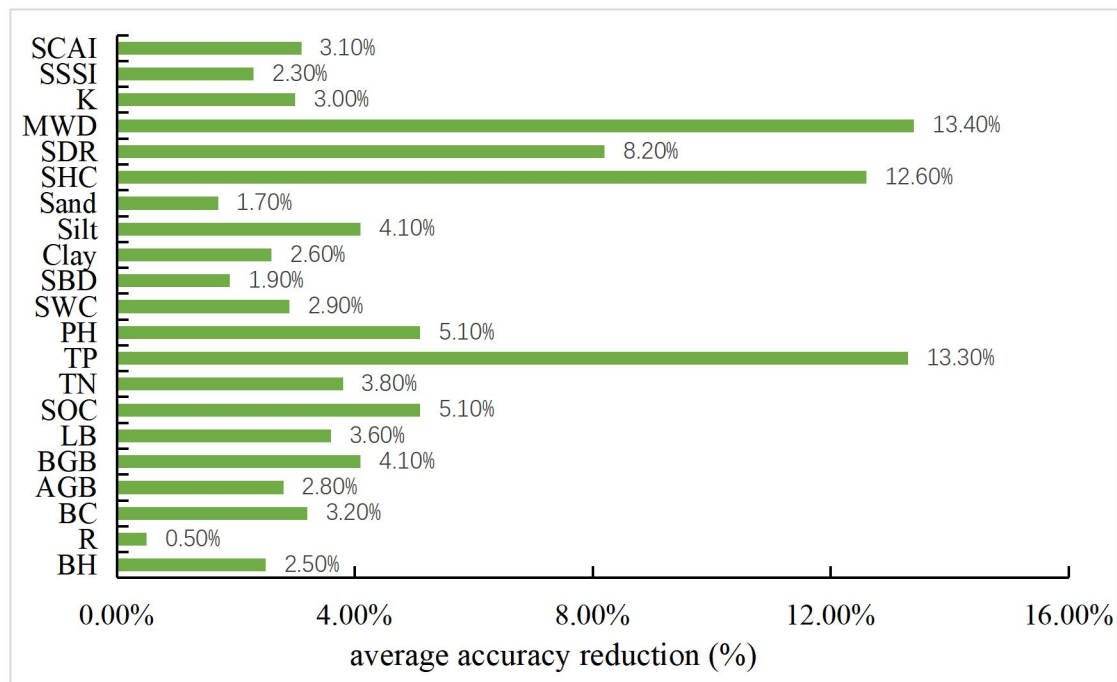

**Fig. S2.** Important rank under different slope aspects. SBD, soil bulk density; Sand: sand content; Silt: silt content; Clay: clay content.

**Table S1** Understory vegetation characteristics of different vegetation types at different slope aspect. Values are in the form of the mean  $\pm$  standard error. Different capital letters indicate significant differences between slope aspects ( $p < 0.05$ ), different lowercase letters indicate significant differences between the four vegetation types ( $p < 0.05$ ).

| Slope aspect | Land use      | Site code | Dominated plant communities | Dominant herbaceous plant                     | Biomass height (m) | Richness          | Biomass coverage (%) | Aboveground biomass (g m <sup>-2</sup> ) | Belowground biomass (g m <sup>-2</sup> ) | Litter biomass (g m <sup>-2</sup> ) |
|--------------|---------------|-----------|-----------------------------|-----------------------------------------------|--------------------|-------------------|----------------------|------------------------------------------|------------------------------------------|-------------------------------------|
| W            | Degraded land | WDAA      | Artemisia annua             | Potentilla chinensis, Artemisia annua         | 0.24 $\pm$ 0.02aA  | 0.71 $\pm$ 0.04aA | 20.11 $\pm$ 6.88bA   | 55.94 $\pm$ 3.52aB                       | 26.48 $\pm$ 4.39bB                       | 54.49 $\pm$ 4.42dA                  |
|              | grassland     | WGAM      | Astragalus melilotoides     | Astragalus melilotoides                       | 0.45 $\pm$ 0.08aA  | 1.15 $\pm$ 0.02aA | 49.42 $\pm$ 20.53aA  | 270.88 $\pm$ 56.11aB                     | 39.19 $\pm$ 22.50aB                      | 96.92 $\pm$ 24.63cA                 |
|              |               | WGCP      | Capillipedium parviflorum   | Capillipedium parviflorum                     | 0.55 $\pm$ 0.11aA  | 1.12 $\pm$ 0.09aA | 47.61 $\pm$ 24.66aA  | 253.4 $\pm$ 30.09aB                      | 73.92 $\pm$ 17.54aB                      | 96.45 $\pm$ 17.50cA                 |
|              | shrubland     | WSHR      | Hippophae rhamnoides        | Artemisia sacrorum, Capillipedium parviflorum | 0.54 $\pm$ 0.17aA  | 1.14 $\pm$ 0.06aA | 28.67 $\pm$ 4.73bA   | 236.15 $\pm$ 36.57aB                     | 26.61 $\pm$ 9.87bB                       | 141.5 $\pm$ 10.99aA                 |
|              |               | WSCK      | Caragana korshinskii        | Artemisia sacrorum, Capillipedium parviflorum | 0.67 $\pm$ 0.39aA  | 1.13 $\pm$ 0.02aA | 30.94 $\pm$ 17.13bA  | 312.83 $\pm$ 8.12aB                      | 29.65 $\pm$ 1.09bB                       | 135.2 $\pm$ 10.50aA                 |
|              | Woodland      | WWLG      | Larix gmelinii              | Astragalus melilotoides, Artemisia sacrorum   | 0.71 $\pm$ 0.05bA  | 1.17 $\pm$ 0.07bA | 35.27 $\pm$ 18.32bA  | 268.23 $\pm$ 30.21bB                     | 76.71 $\pm$ 6.07aB                       | 122 $\pm$ 7.99bA                    |
|              |               | WWPS      | Pinus sylvestris            | Astragalus melilotoides, Artemisia sacrorum   | 0.63 $\pm$ 0.14bA  | 1.11 $\pm$ 0.04bA | 32.67 $\pm$ 13.05bA  | 350.14 $\pm$ 12.38bB                     | 49.17 $\pm$ 13.71aB                      | 113.46 $\pm$ 7.43bA                 |
|              | N             | grassland | NGAM                        | Astragalus                                    | Astragalus         | 0.55 $\pm$ 0.09aA | 1.02 $\pm$ 0.17aA    | 37.79 $\pm$ 1.91aA                       | 292.97 $\pm$ 62.32aA                     | 62.75 $\pm$ 20.67aA                 |

|           |      |                           |                                               |             |             |                    |                     |                    |                    |
|-----------|------|---------------------------|-----------------------------------------------|-------------|-------------|--------------------|---------------------|--------------------|--------------------|
|           |      | melilotoides              | melilotoides                                  |             |             |                    | B                   | B                  | A                  |
|           | NGBI | Bothriochloa ischaemum    | Bothriochloa ischaemum (L.) Keng              | 0.56±0.06aA | 1.01±0.17aA | 67.41±1.28aA       | 282.81±70.70aA<br>B | 79.76±12.14aA<br>B | 89.55±13.09c<br>A  |
| shrubland | NSHR | Hippophae rhamnoides      | Astragalus melilotoides, Potentilla chinensis | 0.72±0.06aA | 1.2±0.11aA  | 56.78±20.08a<br>A  | 305.83±19.11aA<br>B | 46.69±20.66aA<br>B | 175.16±12.81<br>aA |
|           | NSCK | Caragana korshinskii      | Artemisia sacrorum, Capillipedium parviflorum | 0.41±0.05aA | 1.09±0.04aA | 25.11±6.71aA       | 300.94±33.44aA<br>B | 43.08±8.75aAB      | 167.37±12.24<br>aA |
| Woodland  | NWLG | Larix gmelinii            | Artemisia sacrorum, Capillipedium parviflorum | 0.77±0.06aA | 1.12±0.08aA | 31.79±28.25a<br>A  | 295.86±32.64aA<br>B | 88.27±6.15aAB      | 140.2±16.10b<br>A  |
|           | NWPS | Pinus sylvestris          | Astragalus melilotoides                       | 0.63±0.05aA | 1.13±0.02aA | 63.67±14.98a<br>A  | 411.27±49.26aA<br>B | 47.07±9.84aAB      | 130.38±14.98<br>bA |
| grassland | SGAM | Astragalus melilotoides   | Astragalus melilotoides                       | 0.51±0.08bA | 1.12±0.01aA | 43.46±13.38a<br>bA | 304.11±14.56bA<br>B | 77.84±42.56aA<br>B | 110.62±23.76<br>cA |
|           | SGCP | Capillipedium parviflorum | Capillipedium parviflorum                     | 0.42±0.15bA | 1.18±0.09aA | 40.55±12.51a<br>bA | 276.32±63.54bA<br>B | 76.38±49.01aA<br>B | 108.54±6.02c<br>A  |
| S         | SSHR | Hippophae rhamnoides      | Artemisia sacrorum, Potentilla chinensis      | 0.66±0.12bA | 1.19±0.11aA | 28.33±18.58b<br>A  | 397.55±19.17aA<br>B | 56.71±6.77aAB      | 207.31±14.62<br>aA |
| shrubland | SSCK | Caragana korshinskii      | Capillipedium parviflorum, Lespedeza bicolor  | 0.41±0.05bA | 1.1±0.03aA  | 25.11±5.42bA       | 361.4±11.68aAB      | 47.7±7.11aAB       | 198.08±13.97<br>aA |
| Woodland  | SWLG | Larix gmelinii            | Artemisia sacrorum                            | 0.75±0.01aA | 1.09±0.12aA | 54.67±21.36a       | 317.5±20.12aAB      | 91.97±3.46aAB      | 149.14±12.11       |

|   |           |      |                         |                                              |             |             |                   |                     |                    |                    |
|---|-----------|------|-------------------------|----------------------------------------------|-------------|-------------|-------------------|---------------------|--------------------|--------------------|
| E | grassland | SWPS | Pinus sylvestris        | Astragalus melilotoides, Artemisia sacrorum  | 0.69±0.10aA | 1.1±0.11aA  | 60±17.58aA        | 459.27±38.92aA<br>B | 73.73±7.92aAB      | 138.7±11.27b<br>A  |
|   |           | EGAS | Astragalus melilotoides | Artemisia sacrorum                           | 0.54±0.12aA | 0.9±0.06aA  | 55.87±14.29a<br>A | 337.29±56.74bA      | 109.63±18.71a<br>A | 106.87±15.61<br>cA |
|   |           | EGSM | Astragalus melilotoides | Artemisia sacrorum                           | 0.55±0.12aA | 0.96±0.11aA | 51.75±23.80a<br>A | 350.39±37.68bA      | 103.14±3.28aA      | 114.63±2.93c<br>A  |
|   | shrubland | ESHR | Hippophae rhamnoides    | Artemisia sacrorum, Potentilla chinensis     | 0.7±0.24aA  | 1.27±0.08aA | 37.22±6.74aA      | 428.69±34.74ab<br>A | 63.33±3.28cA       | 214.75±32.17<br>aA |
|   |           | ESCK | Caragana korshinskii    | Capillipedium parviflorum, Lespedeza bicolor | 0.69±0.38aA | 1.05±0.01aA | 35.42±17.95a<br>A | 414.61±34.58ab<br>A | 49.49±13.33cA      | 205.19±30.74<br>aA |
|   | Woodland  | EWLG | Larix gmelinii          | Artemisia sacrorum                           | 0.77±0.11aA | 1.03±0.25aA | 40.1±12.90aA      | 364.47±53.42aA      | 92.56±5.59bA       | 152.01±9.17b<br>A  |
|   |           | EWPS | Pinus sylvestris        | Astragalus melilotoides                      | 0.6±0.15aA  | 0.9±0.22aA  | 59±13.89aA        | 552.13±32.97aA      | 73.8±13.84bA       | 141.37±8.53b<br>A  |

**Table S2** Soil characteristics of different vegetation types at different slope aspect. Values are in the form of the mean ± standard error. SWC: soil water content; SBD: soil bulk density; SOC: soil organic carbon; TN: text Normalization; TP: total phosphorus. Different capital letters indicate significant differences between slope aspects ( $p < 0.05$ ), different lowercase letters indicate significant differences between the four vegetation types ( $p < 0.05$ ).

| Slope aspect | Land use | Site code | SWC (%) | BD (g cm <sup>-3</sup> ) | Clay (%) | Silt (%) | Sand (%) | pH |
|--------------|----------|-----------|---------|--------------------------|----------|----------|----------|----|
|--------------|----------|-----------|---------|--------------------------|----------|----------|----------|----|

|          |               |           |               |               |              |              |                |              |
|----------|---------------|-----------|---------------|---------------|--------------|--------------|----------------|--------------|
| W        | Degraded land | WDAA      | 0.08±0.03cC   | 1.63±0.03aA   | 10.25±0.23dD | 9.12±0.12bB  | 80.63±0.32abAB | 8.5±0.11aA   |
|          | grassland     | WGAM      | 0.1±0.01bcC   | 1.58±0.01aA   | 13.63±0.09bD | 5.22±0.17cB  | 81.15±0.14aAB  | 7.6±0.19bA   |
|          |               | WGCP      | 0.1±0.03bcC   | 1.66±0.03aA   | 13.19±0.09bD | 5.52±0.17cB  | 81.29±0.14aAB  | 7.44±0.19bA  |
|          | shrubland     | WSHR      | 0.11±0.02abC  | 1.25±0.02bA   | 12.42±0.23cD | 8.36±0.21bB  | 79.21±0.28bAB  | 6.97±0.07cA  |
|          |               | WSCK      | 0.13±0.01abC  | 1.23±0.03bA   | 12.86±0.23cD | 8.06±0.21bB  | 79.07±0.28bAB  | 6.99±0.07cA  |
|          | Woodland      | WWLG      | 0.12±0.01aC   | 1.26±0.02bA   | 20.11±0.34aD | 18.77±0.43aB | 61.12±0.77cAB  | 7.53±0.02bA  |
|          |               | WWPS      | 0.16±0.01aC   | 1.24±0.01bA   | 20.55±0.26aD | 18.47±0.17aB | 60.98±0.43cAB  | 7.55±0.02bA  |
|          | grassland     | NGAM      | 0.1±0.03bBC   | 1.56±0.01aA   | 13.45±0.36bB | 7.49±0.33bC  | 79.06±0.28bA   | 7.48±0.05aB  |
|          |               | NGBI      | 0.1±0.01bBC   | 1.63±0.13aA   | 13.01±0.36bB | 7.79±0.33bC  | 79.2±0.28bA    | 7.33±0.05aB  |
|          | N             | shrubland | NSHR          | 0.12±0.04abBC | 1.22±0.13bA  | 10.79±0.46cB | 7.62±1.88bC    | 81.59±1.45cA |
| NSCK     |               |           | 0.12±0.02abBC | 1.2±0.07bA    | 11.23±0.46cB | 7.32±1.88bC  | 81.45±1.45cA   | 6.85±0.10bB  |
| Woodland |               | NWLG      | 0.13±0.01aBC  | 1.25±0.07bA   | 18.38±0.08aB | 28.19±0.28aC | 53.43±0.29aA   | 7.48±0.05aB  |
|          |               | NWPS      | 0.16±0.01aBC  | 1.22±0.02bA   | 18.82±1.00aB | 27.89±0.28aC | 53.29±0.72aA   | 7.5±0.05aB   |
| S        | grassland     | SGAM      | 0.1±0.01bAB   | 1.53±0.02aB   | 14.73±0.22bC | 4.45±0.39cB  | 80.82±0.61aB   | 7.35±0.04aC  |
|          |               | SGCP      | 0.11±0.02bAB  | 1.6±0.08aB    | 14.29±0.22bC | 4.75±0.39cB  | 80.96±0.61aB   | 7.2±0.03aC   |
|          | shrubland     | SSHR      | 0.12±0.02aAB  | 1.21±0.08bB   | 11.56±0.09cC | 8.03±0.15bB  | 80.42±0.24bB   | 6.56±0.04bC  |
|          |               | SSCK      | 0.13±0.01aAB  | 1.19±0.13bB   | 12±0.09cC    | 7.73±0.15bB  | 80.28±0.24bB   | 6.58±0.04bC  |
|          | Woodland      | SWLG      | 0.13±0.03aAB  | 1.24±0.13bB   | 20.09±0.23aC | 29.93±0.29aB | 49.98±0.13cB   | 7.29±0.05aC  |
|          |               | SWPS      | 0.16±0.01aAB  | 1.22±0.07bB   | 20.53±0.35aC | 29.63±0.29aB | 49.84±0.62cB   | 7.3±0.05aC   |
| E        | grassland     | EGAS      | 0.11±0.01aA   | 1.34±0.11aB   | 13.44±0.13bA | 6.55±0.12bA  | 80.01±0.01bC   | 7.16±0.02bB  |
|          |               | EGSM      | 0.11±0.02aA   | 1.41±0.12aB   | 13±0.13bA    | 6.85±0.12bA  | 80.15±0.01bC   | 7.01±0.01bB  |
|          | shrubland     | ESHR      | 0.11±0.01abA  | 1.14±0.09bB   | 10.65±1.04cA | 6.15±1.22bA  | 83.2±1.30aC    | 6.34±0.27cB  |
|          |               | ESCK      | 0.14±0.02abA  | 1.12±0.05bB   | 11.09±1.04cA | 5.85±1.22bA  | 83.06±1.30aC   | 6.36±0.27cB  |
|          | Woodland      | EWLG      | 0.13±0.01bA   | 1.2±0.03bB    | 18.94±0.20aA | 25.01±0.22aA | 56.05±0.02cC   | 7.26±0.04aB  |
|          |               | EWPS      | 0.17±0.01bA   | 1.17±0.03bB   | 19.38±0.20aA | 24.71±0.22aA | 55.91±0.02cC   | 7.28±0.04aB  |
